# Supplementary material for: Multilocus Genetic Risk Scores for Venous Thromboembolism Risk Assessment
Source: PubMed Central journal article supplement — J Am Heart Assoc. 2014 Oct 23;3(5):e001060. doi: 10.1161/JAHA.114.001060 (PMC4323784; doi:10.1161/jaha.114.001060), 2014-10-23
Supplement: jah3-3-e001060-s1.pdf [file jah3-3-e001060-s1.pdf]

**SUPPLEMENTAL MATERIAL**

**MULTILOCUS GENETIC RISK SCORES FOR VENOUS THROMBOEMBOLISM RISK ASSESSMENT**

Soria et al

**Table 1.** Genetic variants included in the different genetic risk scores (GRS) assessed: coefficients (weights) assigned to each genetic risk factor, and allele frequency and Hardy-Weinberg equilibrium (H-W) data obtained in the two studies, Sant Pau and MARTHA.

| SNP         | Gene                | Mutation     | Genetic risk group*    | Risk coefficient assigned | GRS |   |   |   | SANT PAU              |       | MARTHA                |       |
|-------------|---------------------|--------------|------------------------|---------------------------|-----|---|---|---|-----------------------|-------|-----------------------|-------|
|             |                     |              |                        |                           | 1   | 2 | 3 | 4 | Rare allele Frequency | H-W   | Rare allele frequency | H-W   |
| rs6025      | <i>F5 Leiden</i>    | R506         | A carriers             | 1.589                     |     |   |   |   | 0.01                  | 0.873 | 0.11                  | 0.008 |
| rs118203905 | <i>F5 Hong Kong</i> | F5 Hong Kong | A carriers             | 1.589                     |     |   |   |   |                       |       | 0.00                  | 0.982 |
| rs118203906 | <i>F5 Cambridge</i> | F5 Cambridge | C carriers             | 1.589                     |     |   |   |   |                       |       | 0.00                  | ---   |
| rs1799963   | <i>F2</i>           | G20210A      | A carriers             | 0.293                     |     |   |   |   | 0.01                  | 0.822 | 0.10                  | 0.020 |
| ABO**       | <i>ABO</i>          |              | A1 carriers            | 0.956                     |     |   |   |   |                       |       |                       |       |
| rs8176719   | <i>ABO</i>          |              |                        | --                        |     |   |   |   |                       |       | 0.36                  | 0.262 |
| rs1801020   | <i>F12</i>          | C46T         | TT homoz.              | 1.633                     |     |   |   |   | 0.21                  | 0.033 | 0.23                  | 0.223 |
| rs5985      | <i>F13</i>          | V34L         | GG homoz.              | 0.198                     |     |   |   |   | 0.25                  | 0.832 | 0.27                  | 0.929 |
| rs2232698   | <i>SERPINE10</i>    | R67X         | T carriers             | 1.358                     |     |   |   |   | 0.01                  | 0.898 | 0.01                  | 0.854 |
| rs121909548 | <i>SERPINC1</i>     | A384S        | T carriers             | 2.277                     |     |   |   |   | 0.00                  | 0.975 | 0.00                  | 0.945 |
| rs2036914   | <i>FXI</i>          |              | CT heter.<br>TT homoz. | 0.293<br>0.519            |     |   |   |   | 0.46                  | 0.293 | 0.50                  | 0.890 |
| rs2066865   | <i>FGG</i>          |              | TT homoz.              | 0.344                     |     |   |   |   | 0.21                  | 0.739 | 0.23                  | 0.028 |
| rs710446    | <i>KNG1</i>         |              | CC homoz.              | 0.182                     |     |   |   |   | 0.44                  | 0.831 | 0.42                  | 0.131 |
| rs2289252   | <i>FXI</i>          |              | CT heter.<br>TT homoz. | 0.315<br>0.577            |     |   |   |   | 0.40                  | 0.788 | 0.40                  | 0.655 |

\*Homoz.=Homozygous; Heter.=Heterozygous. \*\* ABO: A1 carriers (rs8176719, rs7853989, rs8176743, rs8176750)



|                                      |  |    |      |      |              |              |              |                |
|--------------------------------------|--|----|------|------|--------------|--------------|--------------|----------------|
|                                      |  |    |      |      |              |              |              | 0.577          |
| Arellano (2010) : Heteroz.<br>Homoz. |  | 20 | 3921 | 4634 | 1.37<br>1.78 | 1.24<br>1.57 | 1.51<br>2.01 |                |
| Austin (2011): Heteroz.<br>Homoz.    |  | 21 | 1076 | 1239 | 1.40<br>1.80 | 1.10<br>1.30 | 1.80<br>2.50 |                |
| Meta-analysis: Heteroz.<br>Homoz.    |  |    |      |      | 1.37<br>1.78 |              |              | 0.315<br>0.577 |

\*In the case of the variant rs5985, the rare variant was associated with lower probability of presenting a VTE. To build the GRS the common variant was considered to be associated with a higher probability of presenting of VTE.

**Table 3.** Observed and expected strengths of associations between selected clinical or genetic factors and venous thromboembolic events and p-values for the differences between observed and expected values.

|                                 | Expected coefficients | SANT PAU     |                |           | MARTHA       |                |          |
|---------------------------------|-----------------------|--------------|----------------|-----------|--------------|----------------|----------|
|                                 |                       | Observed     |                | p-value * | Observed     |                | p-value* |
|                                 |                       | Coefficients | Standard Error |           | Coefficients | Standard Error |          |
| Family History                  | 1.185                 | 0.711        | 0.240          | 0.323     | NA           | NA             | NA       |
| <i>F5</i> ** †                  | 1.589                 | 2.803        | 0.755          | 0.421     | 0.805        | 0.178          | 0.028    |
| <i>F2</i> - rs1799963 †         | 0.293                 | 0.773        | 0.489          | 0.624     | 0.378        | 0.199          | 0.831    |
| ABO (A1)†                       | 0.956                 | 0.997        | 0.224          | 0.927     | 0.428        | 0.280          | 0.346    |
| <i>F12</i> - rs1801020 †        | 1.633                 | 0.859        | 0.621          | 0.533     | 0.305        | 0.345          | 0.054    |
| <i>F13</i> - rs5985 †           | 0.198                 | -0.078       | 0.224          | 0.538     | 0.171        | 0.152          | 0.929    |
| <i>SERPINE10</i> - rs2232698 †  | 1.358                 | 0.937        | 0.753          | 0.780     | 0.572        | 0.502          | 0.434    |
| <i>SERPINC1</i> - rs121909548 † | 2.277                 | 1.476        | 1.174          | 0.733     | -0.983       | 1.264          | 0.197    |
| <i>F11</i> - rs2036914 Hetero   | 0.293                 | -0.039       | 0.273          | 0.543     | 0.228        | 0.207          | 0.875    |
| Homo                            | 0.519                 | 0.028        | 0.395          | 0.534     | 0.206        | 0.258          | 0.544    |

|                               |       |        |       |       |        |       |       |
|-------------------------------|-------|--------|-------|-------|--------|-------|-------|
| <i>FGG</i> - rs2066865 †      | 0.344 | -0.095 | 0.227 | 0.334 | 0.328  | 0.151 | 0.958 |
| <i>KNG1</i> - rs710446b ‡     | 0.182 | -0.206 | 0.278 | 0.485 | -0.086 | 0.190 | 0.481 |
| <i>F11</i> - rs2289252 Hetero | 0.315 | 0.186  | 0.299 | 0.829 | 0.191  | 0.190 | 0.744 |
| Homo                          | 0.577 | -0.017 | 0.403 | 0.461 | 0.965  | 0.262 | 0.459 |
|                               |       |        |       |       |        |       |       |

\*for the difference between observed and expected coefficients.

\*\* Carrier of any risk allele (Leiden, Hong-Kong or Cambridge).

NA indicates not applicable.

## References:

1. Juul K, Tybjaerg-Hansen A, Schnohr P, Nordestgaard BG. Factor V Leiden and the risk for venous thromboembolism in the adult Danish population. *Ann Intern Med.* 2004;140:330-337.
2. Wu O, Robertson L, Twaddle S, Lowe G, Clark P, Walker I, Brenkel I, Greaves M, Langhorne P, Regan L, Greer I; Thrombosis: Risk and Economic Assessment of Thrombophilia Screening (TREATS) Study. Screening for thrombophilia in high-risk situations: a meta-analysis and cost-effectiveness analysis. *Br J Haematol.* 2005;131:80-90.
3. Tirado I, Mateo J, Soria JM, Oliver A, Martínez-Sánchez E, Vallvé C, Borrell M, Urrutia T, Fontcuberta J. The ABO blood group genotype and factor VIII levels as independent risk factors for venous thromboembolism. *Thromb Haemost.* 2005;93:468-474.
4. De Haan HG, Bezemer ID, Doggen CJM, Le Cessie S, Reitsma PH, Arellano AR, Tong CH, Devlin JJ, Bare LA, Rosendaal FR, Vossen CY. Multiple SNP testing improves risk prediction of first venous thrombosis. *Blood.* 2012;120:656-663.
5. Tirado I, Soria JM, Mateo J, Oliver A, Souto JC, Santamaria A, Felices R, Borrell M, Fontcuberta J. Association after linkage analysis indicates that homozygosity for the 46C>T polymorphism in the F12 gene is a genetic risk factor for venous thrombosis. *Thromb Haemost.* 2004;91:899-904
6. Reuner KH, Jenetzky E, Aleu A, Litfin F, Mellado P, Kloss M, Jüttler E, Grau AJ, Rickmann H, Patscheke H, Lichy C. Factor XII c46T genepolymorphism and the risk of cerebral venous thrombosis. *Neurology.* 2008;70:129-132.
7. Cochery-Nouvellon E, Mercier E, Lissalde-Lavigne G, Daurès JP, Quéré I, Dauzat M, Marès P, Gris JC. Homozygosity for the C46T polymorphism of the F12 gene is a risk factor for venous thrombosis during the first

pregnancy. *J Thromb Haemost.* 2007;5:700-707.

8. Catto AJ, Kohler HP, Coore J, Mansfield MW, Stickland MH, Grant PJ. Association of a common polymorphism in the factor XIII gene with venous thrombosis. *Blood.* 1999;93:906-908.

9. Wells PS, Anderson JL, Scarvelis DK, Doucette SP, Gagnon F. Factor XIII Val34Leu variant is protective against venous thromboembolism: a HuGE review and meta-analysis. *Am J Epidemiol.* 2006;164:101-109.

10. Van HylckamaVlieg A, Komansin N, Ariëns RAS, Poort SR, Grant PJ, Bertina RM, Rosendaal FR. Factor XIII Val34Leu polymorphism, factor XIII antigen levels and activity and the risk of deep venous thrombosis. *BJH.* 2002;119:169-175.

11. Corral J, Gonzalez-Conejero R, Soria JM, Gonzalez-Porrás JR, Pérez-Ceballos E, Lecumberri R, Roldán V, Souto JC, Miñano A, Hernández-Espinosa D, Alberca I, Fontcuberta J, Vicente V. A nonsense polymorphism in the protein Z-dependent protease inhibitor increases the risk for venous thrombosis. *Blood.* 2006;108:177-183.

12. Van de Water N, Tan T, Ashton F, O'Grady A, Day T, Browett P, Ockelford P, Harper P. Mutations within the protein Z-dependent protease inhibitor gene are associated with venous thromboembolic disease: a new form of thrombophilia. *Br J Haematol.* 2004;127:190-194.

13. Corral J, Hernandez-Espinosa D, Soria JM. Antithrombin Cambridge II (A384S): an underestimated genetic risk factor for venous thrombosis. *Blood.* 2007;109:4258-4263.

14. Austin H, De Staercke C, Lally C, Bezemer ID, Rosendaal FR, Hooper WC. New gene variants associated with venous thrombosis: a replication study in White and black Americans. *J Thromb Haemost.* 2011;9:489-495.

15. Bezemer ID, Bare LA, Doggen CJ, Arellano AR, Tong C, Rowland CM, Catanese J, Young BA, Reitsma PH,

- Devlin JJ, Rosendaal FR. Gene variants associated with deep vein thrombosis. *JAMA*. 2008;299:1306-1314.
16. De Haan HG, Bezemer ID, Doggen CJM, Le Cessie S, Reitsma PH, Arellano AR, Tong CH, Devlin JJ, Bare LA, Rosendaal FR, Vossen CY. Multiple SNP testing improves risk prediction of first venous thrombosis. *Blood*. 2012;120:656-663.
17. Uitte de Willige S, de Visser MC, Houwing-Duistermaat JJ, Rosendaal FR, Vos HL, Bertina RM. Genetic variation in the fibrinogen gamma gene increases the risk of deep venous thrombosis by reducing plasma fibrinogen gamma levels. *Blood*. 2005;106:4176-7183.
18. Grünbacher G, Weger W, Max-Neuhold E, Pilger E, Köppel H, Wascher T, März W, Renner W. The fibrinogen gamma (FGG) 10034C>T polymorphism is associated with venous thrombosis. *Thromb Res*. 2007;121:33-36.
19. Morange PE, Oudot-Mellakh T, Cohen W, Germain M, Saut N, Antoni G, Alessi MC, Bertrand M, Dupuy AM, Letenneur L, Lathrop M, Lopez LM, Lambert JC, Emmerich J, Amouyel P, trégoüet DA. KNG1 ile581Thr and susceptibility to venous thrombosis. *Blood*. 2011;117:3692- 3694.
20. Arellano AR, Bezemer ID, Tong CH, Catanese JJ, Devlin JJ, Reitsma PH, Bare LA, Rosendaal FR. Gene variants associated with venous thrombosis: confirmation in the MEGA study. *J Thromb Haemost*. 2010;8:1132-1134.
21. Austin H, De Staercke C, Lally C, Bezemer ID, Rosendaal FR, Hooper WC. New gene variants associated with venous thrombosis: a replication study in White and black Americans. *J Thromb Haemost*. 2011;9:489-495.
